# Supplementary material
Source: HighWire-hosted journal article supplement (https://bmjopenrespres.bmj.com/content/10/1/e001506)
Supplement: inline-supplementary-material-1 [file inline-supplementary-material-1.pdf]

## ONLINE DATA SUPPLEMENT

**Sleep Apnoea and Hypoventilation in Patients with Five Major Types of Muscular Dystrophy**

Leping Li, David M. Umbach, Yuanyuan Li, Pallav Hallani, Min Shi, Mihye Ahn, Deryck Yeung, Bradley Vaughn, and Zheng Fan

**Statistical Methods***General Considerations*

Our data involves results of 104 PSG studies conducted on 73 different patients. In analyzing such data, application of appropriate statistical techniques is important for valid results. The differences in muscular dystrophy types that we are interested are inherently questions about patients, but some of the associations that we probe involve patient characteristics that can change from PSG study to PSG study. Consequently, repeated studies on a single patient can aid in inference about muscular dystrophy types. Results from repeated studies on a single patient are generally more similar than results from the same number of studies on different patients. This within-patient correlation means that the amount of additional information provided by including a second PSG on a patient is less than that provided by including a new patient to the data set. A statistical approach known as Generalized Estimating Equations (GEE) [2] was developed to address within-patient correlations for data structured like ours. Heuristically, this approach can be thought of as estimating the within-patient correlation and using it to appropriately weigh responses from multiple PSGs on the same patients vis-à-vis responses from single PSGs from other patients.

We used the GEE approach with an exchangeable correlation structure [2] when examining associations. For responses modeled as continuous, such as heart rate or AHI, our GEE models used a normal distribution with the identity link function. For binary responses, such as apnoea or hypoventilation, our GEE models used a binomial distribution with the logistic link function.

Although we have a reasonably large collection of muscular dystrophy patients with PSG data, we have more limited data on each individual muscular dystrophy type. With only 104 PSG studies and 73 patients altogether, our data set supports only small numbers of predictors in individual statistical models and limits statistical power. Consequently, we examined associations between response variable and individual predictor variables including limited adjustment for selected covariates like age, sex, and categorical BMI z-score. In general, we report p values without accounting for multiple testing although we employ the Tukey-Kramer procedure [3] for pairwise comparisons among types. For model fitting, we used PROC GENMOD in SAS (version 9.4).

When fitting models to continuous outcomes with the goal of comparing muscular dystrophy types and adjusting for covariates, we report mean values for each type or mean differences between pairs of types as estimated by the fitted model. The estimated means are associated with a specified set of covariate values but, under the models we used, the mean differences are not. We chose a set that we regarded as a reference baseline: male sex, normal BMI (a category with  $-2 \leq \text{BMI z-score} \leq 2$ ), and age 15 yrs (a convenient integer value between the mean and median age of patients at the time of their PSG study). When fitting models to binary outcomes, we proceeded in the same way, but the quantities estimated are odds and odds ratios instead of means and mean differences, respectively.

#### *Analysis of Heart Rates*

We used the same statistical modelling approach for all three heart rate variables: initial heart rate (before sleep onset); average heart rate during sleep; and peak heart during sleep. Using GEE, we fit a regression model with heart rate as the dependent variable; the model included muscular dystrophy type and  $\log_2(\text{age in yrs})$  as predictors. We use  $\log_2(\text{age})$  instead of age itself because the relationship between heart rate and  $\log_2(\text{age})$  exhibited a linear, rather than curved, relationship. We examined residual plots for deviations from model assumptions. If we detected possible outliers with any heart rate, we conducted a sensitivity analysis by removing those outlying data points and refitting the model on the reduced data set. In every

instance, the original analysis and the sensitivity analysis reached similar conclusions. We report the analysis based on the full data set.

#### *Analysis of AHI*

Using GEE, we fit a regression model with AHI as the dependent variable; the model included muscular dystrophy type, age, sex, and categorical BMI z-score (described in the main text) as predictors. Because of some evidence of skewness in residuals from this model, we conducted a sensitivity analysis by transforming AHI to the square root of AHI and refitting the model. Because we reached similar conclusions with both models, we report the analysis using AHI (without transformation) as providing estimates in customary units (events/hr).

#### *Separate Analyses of Sleep Apnoea and of Hypoventilation*

Because sleep apnoea and hypoventilation are each binary variables (present/absent), we fit logistic regression models with either sleep apnoea or hypoventilation as the dependent variable using GEE. The model for sleep apnoea included five-category muscular dystrophy type, age, sex, and categorical BMI z-score as predictors. The model for hypoventilation included the same covariates except the categorization of muscular dystrophy type was modified because no patients with BMD exhibited hypoventilation. Consequently, we opted to combine BMD and DMD, two types with a closely related genetic origin, into a single type so the model for hypoventilation included a four-category muscular dystrophy type.

#### *Joint Analysis of Hypoventilation and Sleep Apnoea*

Using GEE, we assessed the association of hypoventilation with sleep apnoea using logistic regression models with hypoventilation as the dependent variable. In the first model where the only predictor was sleep apnoea, we assessed the association without adjustment for any other factors. In the second model, in addition to sleep apnoea, we included the four-category muscular dystrophy type (BMD and DMD combined), age, sex, and categorical BMI z-score. In sensitivity analyses, we interchanged the roles of sleep apnoea and hypoventilation – making sleep apnoea the dependent variable and hypoventilation the predictor – and fitting the same

two models. This sensitivity analysis did not modify conclusions about the association of hypoventilation and sleep apnoea, so we report results from models with hypoventilation as the dependent variable.

#### *Joint Analysis of Hypoventilation and AHI*

For this analysis, we used GEE and fit a logistic regression model with hypoventilation as the dependent variable. Predictors included four-category muscular dystrophy type, age, sex, categorical BMI-z-score, and AHI. In a sensitivity analysis, we replaced AHI as a predictor in the model with the square root of AHI, but conclusions were unchanged.

#### **Supplementary results**

##### *Heart rates in patients with muscular dystrophy*

Three PSG studies failed to record baseline heart rate; 31 failed to record average and peak heart rate during sleep, leaving 101 and 73 studies representing 72 and 53 patients with data on baseline and in-sleep heart rates, respectively. Correlations of baseline heart rate measurements with in-sleep average and peak heart rate measurements were both high (0.83 and 0.73, respectively,  $p < 0.0001$  for each). The correlation of average and peak heart rates during sleep was also high (0.76,  $p < 0.0001$ ).

We compared the mean baseline heart rate and the mean average and peak heart rates during sleep among muscular dystrophy types after regression adjustment for log-transformed age (see supplementary statistical methods). Age-adjusted mean heart rates, whether measured at baseline or during sleep, varied among types (Table S7A) with DMD patients tending to have among the highest rates and DM patients among the lowest. Patients with DMD had significantly, or nearly significantly, higher baseline heart rate and average and peak heart rates during sleep than those of patients with DM; ( $p = 0.003$ ,  $p < 0.0001$ , and  $p = 0.02$ , respectively); mean differences were approximately 10 bpm (Table S7B). Similarly, patients with CMD had significantly higher average and peak heart rates during sleep than those of DM patients again with mean differences near 10 bpm ( $p = 0.03$ ,  $p < 0.0001$  and  $p = 0.0006$ , respectively). Differences

in heart rate among other pairs of muscular dystrophy types were generally smaller and not statistically significant.

## References

1. Berry RB, Brooks R, Gamaldo C, Harding SM, Lloyd RM, Quan SF, Troester MT, Vaughn BV. AASM Scoring Manual Updates for 2017 (Version 2.4). *J Clin Sleep Med* 2017; 13(5): 665-666.
2. Liang KY, Zeger SL. Longitudinal Data-Analysis Using Generalized Linear-Models. *Biometrika* 1986; 73(1): 13-22.
3. Hsu J. Multiple Comparisons: Theory and Methods. Chapman & Hall/CRC, London, 1996.

**Table S1.** Clinic characteristics of the 73 muscular dystrophy patients with 104 reports.

| Patient | DM Type | Age(yr) | Sex | Echo.    | Beta blocker | ABG (PCO <sub>2</sub> /bicarb) | MIP/MEP        | Trach. | On Ventil. | Snore | Epwo. | Hyp o. | AHI  | Vital Status | Age at death |
|---------|---------|---------|-----|----------|--------------|--------------------------------|----------------|--------|------------|-------|-------|--------|------|--------------|--------------|
| 3       | BMD     | 3.4     | M   | NL LVEF  | -            | /19(v)                         | unable         | -      | -          | -     | n/d   | 0      | 19.9 | alive        | n/a          |
| 3       | BMD     | 4.1     | M   | NL LVEF  | -            | /19(v)                         | unable         | -      | -          | -     | 12    | 0      | 0.6  | alive        | n/a          |
| 55      | BMD     | 18.0    | M   | 38% LVEF | +            | 47/26(v)                       | n/d            | -      | -          | -     | 4     | 0      | 39.0 | deceased     | 18           |
| 58      | BMD     | 15.1    | M   | NL LVEF  | -            | n/d                            | n/d            | -      | -          | -     | 21    | 0      | 2.4  | alive        | n/a          |
| 60      | BMD     | 58.5    | M   | NL LVEF  | +            | n/d                            | n/d            | -      | -          | -     | 4     | 0      | 35.5 | alive        | n/a          |
| 66      | BMD     | 54.4    | M   | n/d      | -            | n/d                            | n/d            | -      | -          | -     | 10    | 0      | 32.2 | alive        | n/a          |
| 66      | BMD     | 57.5    | M   | n/d      | -            | n/d                            | n/d            | -      | -          | -     | 9     | 0      | 17.6 | alive        | n/a          |
| 6       | CMD     | 11.5    | M   | n/d      | -            | n/d                            | n/d            | -      | -          | -     | n/d   | 0      | 4.2  | alive        | n/a          |
| 6       | CMD     | 13.4    | M   | n/d      | -            | n/d                            | n/d            | -      | -          | -     | n/d   | 0      | 0.3  | alive        | n/a          |
| 6       | CMD     | 14.3    | M   | NL LVEF  | -            | 32/25                          | 22/25(23%/15%) | -      | -          | -     | n/d   | 1      | 6.7  | alive        | n/a          |
| 7       | CMD     | 17.1    | M   | NL LVEF  | -            | n/d                            | 27/45(28%/26%) | -      | -          | -     | n/d   | 1      | 9.0  | alive        | n/a          |
| 13      | CMD     | 15.5    | M   | NL LVEF  | -            | 45/24                          | 25/15(26%/9%)  | -      | -          | -     | 2     | 0      | 0.3  | alive        | n/a          |
| 29      | CMD     | 12.3    | M   | NL LVEF  | -            | n/d                            | 85/57          | -      | -          | -     | n/d   | 1      | 10.9 | alive        | n/a          |
| 35      | CMD     | 4.4     | M   | n/d      | -            | 52/24                          | unable         | +      | -          | -     | n/d   | 0      | 1.7  | deceased     | 6            |
| 43      | CMD     | 14.2    | M   | NL LVEF  | -            | 45/26                          | 55/60(57%/35%) | -      | -          | -     | n/d   | 1      | 0.0  | alive        | n/a          |
| 69      | CMD     | 19.3    | F   | NL LVEF  | +            | 62/33                          | n/d            | -      | -          | -     | n/d   | 0      | 12.6 | deceased     | 21           |
| 2       | DM      | 69.2    | F   | NL LVEF  | -            | /30(v)                         | 14/23          | -      | -          | -     | 5     | 1      | 6.3  | alive        | n/a          |
| 9       | DM      | 28.7    | F   | n/d      | -            | n/d                            | n/d            | -      | -          | -     | 11    | 0      | 0.0  | alive        | n/a          |
| 12      | DM      | 47.5    | M   | n/d      | -            | n/d                            | n/d            | -      | -          | -     | n/d   | 0      | 14.2 | n/d          | n/a          |
| 12      | DM      | 50.9    | M   | n/d      | -            | n/d                            | n/d            | -      | -          | -     | n/d   | 1      | 6.6  | alive        | n/a          |
| 15      | DM      | 13.0    | F   | n/d      | -            | n/d                            | n/d            | +      | +          | -     | n/d   | 0      | 0.0  | deceased     | 28           |
| 16      | DM      | 57.4    | M   | NL LVEF  | -            | /29(v)                         | n/d            | -      | -          | -     | n/d   | 1      | 15.5 | alive        | n/a          |
| 17      | DM      | 26.8    | F   | n/d      | -            | /27(v)                         | n/d            | -      | -          | -     | 9     | 0      | 0.1  | alive        | n/a          |
| 18      | DM      | 57.5    | M   | NL LVEF  | -            | /25(v)                         | n/d            | -      | -          | -     | 5     | 0      | 0.5  | alive        | n/a          |
| 19      | DM      | 22.0    | M   | n/d      | -            | n/d                            | n/d            | -      | -          | -     | n/d   | 1      | 5.6  | alive        | n/a          |
| 19      | DM      | 22.0    | M   | n/d      | -            | n/d                            | n/d            | -      | -          | -     | n/d   | 1      | 6.8  | alive        | n/a          |
| 19      | DM      | 31.7    | M   | NL LVEF  | -            | /33(v)                         | n/d            | -      | -          | -     | 12    | 0      | 6.5  | alive        | n/a          |
| 24      | DM      | 12.6    | F   | NL LVEF  | -            | 50/23                          | n/d            | +      | -          | -     | 0     | 0      | 2.2  | alive        | n/a          |
| 24      | DM      | 1.3     | F   | n/d      | -            | n/d                            | n/d            | +      | -          | -     | n/d   | 0      | 0.2  | alive        | n/a          |
| 24      | DM      | 15.4    | F   | NL LVEF  | -            | /29(v)                         | n/d            | +      | -          | -     | n/d   | 1      | 18.2 | alive        | n/a          |
| 24      | DM      | 2.8     | F   | n/d      | -            | n/d                            | n/d            | -      | -          | -     | n/d   | 1      | 3.4  | alive        | n/a          |
| 24      | DM      | 5.3     | F   | n/d      | -            | n/d                            | n/d            | +      | -          | -     | n/d   | 0      | 0.7  | alive        | n/a          |

|    |     |      |   |             |   |        |                |   |   |   |     |   |      |          |     |
|----|-----|------|---|-------------|---|--------|----------------|---|---|---|-----|---|------|----------|-----|
| 24 | DM  | 7.3  | F | n/d         | - | n/d    | n/d            | + | - | - | 4   | 1 | 3.3  | alive    | n/a |
| 24 | DM  | 7.7  | F | n/d         | - | n/d    | n/d            | + | - | - | n/d | 1 | 0.8  | alive    | n/a |
| 24 | DM  | 8.5  | F | n/d         | - | n/d    | n/d            | + | - | - | 4   | 0 | 3.4  | alive    | n/a |
| 25 | DM  | 12.3 | M | n/d         | - | n/d    | 12/23          | - | - | - | 0   | 0 | 7.3  | alive    | n/a |
| 26 | DM  | 47.3 | M | NL LVEF     | - | 75/40  | unable         | - | - | - | 14  | 1 | 10.4 | deceased | 51  |
| 30 | DM  | 32.5 | F | NL LVEF     | - | 37/26  | n/d            | - | - | + | n/d | 1 | 5.6  | alive    | n/a |
| 32 | DM  | 12.1 | M | n/d         | - | n/d    | n/d            | - | - | - | n/d | 0 | 0.6  | alive    | n/a |
| 42 | DM  | 9.2  | F | NL LVEF     | - | /29(v) | n/d            | - | - | - | n/d | 0 | 4.7  | alive    | n/a |
| 45 | DM  | 26.7 | F | n/d         | - | n/d    | n/d            | - | - | - | 6   | 0 | 0.2  | n/d      | n/a |
| 47 | DM  | 0.3  | M | NL LVEF     | - | n/d    | n/d            | - | - | - | n/d | 0 | 1.4  | alive    | n/a |
| 47 | DM  | 0.5  | M | n/d         | - | 41/18  | n/d            | - | - | - | 0   | 0 | 10.2 | alive    | n/a |
| 47 | DM  | 0.9  | M | n/d         | - | n/d    | n/d            | - | - | - | 8   | 0 | 9.0  | alive    | n/a |
| 52 | DM  | 5.5  | M | n/d         | - | /30(v) | n/d            | + | - | - | n/d | 0 | 7.9  | alive    | n/a |
| 52 | DM  | 7.7  | M | NL LVEF     | - | /34(v) | n/d            | + | - | - | 11  | 1 | 9.6  | alive    | n/a |
| 54 | DM  | 45.3 | F | NL LVEF     | - | /27(v) | n/d            | - | - | - | 9   | 0 | 39.4 | alive    | n/a |
| 56 | DM  | 4.3  | M | NL LVEF     | - | n/d    | n/d            | - | - | - | n/d | 0 | 9.0  | alive    | n/a |
| 57 | DM  | 66.1 | F | NL LVEF     | + | n/d    | 49/68          | - | - | - | n/d | 0 | 6.0  | alive    | n/a |
| 64 | DM  | 31.0 | F | n/d         | - | n/d    | 38/43          | - | - | - | n/d | 0 | 7.6  | alive    | n/a |
| 68 | DM  | 28.3 | F | n/d         | - | n/d    | n/d            | - | - | - | n/d | 1 | 9.7  | alive    | n/a |
| 70 | DM  | 26.2 | F | n/d         | - | 34/21  | n/d            | - | - | - | n/d | 0 | 10.6 | deceased | 27  |
| 73 | DM  | 33.3 | F | n/d         | - | n/d    | n/d            | - | - | + | 15  | 1 | 10.8 | alive    | n/a |
| 1  | DMD | 2.8  | M | NL LVEF     | - | /26(v) | unable         | + | - | - | n/d | 0 | 6.4  | alive    | n/a |
| 5  | DMD | 12.2 | M | low LVEF    | - | /25(v) | n/d            | - | - | - | n/d | 0 | 3.5  | alive    | n/a |
| 8  | DMD | 23.9 | M | NL LVEF     | + | n/d    | n/d            | - | - | - | 0   | 0 | 14.2 | alive    | n/a |
| 8  | DMD | 25.4 | M | NL LVEF     | - | 44/30  | 43/28          | - | - | - | 0   | 1 | 3.8  | alive    | n/a |
| 10 | DMD | 13.9 | M | low LVEF    | - | n/d    | n/d            | - | - | - | 4   | 0 | 13.6 | deceased | 15  |
| 11 | DMD | 13.7 | M | 35-40% LVEF | - | n/d    | 8/28(8%/16%)   | - | - | - | 4   | 0 | 1.2  | deceased | 17  |
| 14 | DMD | 20.3 | M | NL LVEF     | - | n/d    | 32/33          | - | - | - | 2   | 0 | 8.0  | deceased | 26  |
| 20 | DMD | 14.3 | M | NL LVEF     | - | n/d    | n/d            | - | - | - | n/d | 1 | 49.2 | deceased | 21  |
| 21 | DMD | 11.5 | M | 33% LVEF    | - | /28(v) | n/d            | - | - | - | n/d | 1 | 3.3  | deceased | 15  |
| 22 | DMD | 12.7 | M | 48% LVEF    | - | /28(v) | 35/45(36%/26%) | - | - | - | 17  | 0 | 9.8  | alive    | n/a |
| 23 | DMD | 16.3 | M | NL LVEF     | - | 35/24  | n/d            | - | - | - | n/d | 1 | 12.5 | alive    | n/a |
| 27 | DMD | 12.3 | M | NL LVEF     | - | 35/20  | 40/53          | - | - | - | 8   | 1 | 9.7  | alive    | n/a |
| 27 | DMD | 18.7 | M | NL LVEF     | - | /22(v) | 43/            | - | - | - | 7   | 0 | 24.1 | alive    | n/a |
| 28 | DMD | 12.3 | M | 48% LVEF    | - | n/d    | unable         | - | - | - | n/d | 1 | 4.0  | alive    | n/a |
| 28 | DMD | 13.6 | M | 52% LVEF    | - | n/d    | n/d            | - | - | - | 8   | 0 | 1.8  | alive    | n/a |

|    |      |      |   |          |   |          |                |   |   |   |     |     |      |          |     |
|----|------|------|---|----------|---|----------|----------------|---|---|---|-----|-----|------|----------|-----|
| 28 | DMD  | 14.5 | M | 53% LVEF | - | /27(v)   | n/d            | - | - | - | 0   | 0   | 6.8  | alive    | n/a |
| 31 | DMD  | 17.3 | M | 59% LVEF | - | /27(v)   | n/d            | - | - | - | 8   | 0   | 12.2 | alive    | n/a |
| 36 | DMD  | 6.7  | M | NL LVEF  | - | /22(v)   | n/d            | - | - | - | n/d | 0   | 0.1  | alive    | n/a |
| 37 | DMD  | 11.9 | M | NL LVEF  | - | n/d      | n/d            | - | - | - | 8   | 1   | 2.4  | alive    | n/a |
| 38 | DMD  | 22.7 | M | 32% LVEF | + | n/d      | n/d            | - | - | - | 8   | 0   | 0.2  | alive    | n/a |
| 39 | DMD  | 10.1 | M | n/d      | - | /27(v)   | n/d            | - | - | - | n/d | 0   | 0.5  | alive    | n/a |
| 44 | DMD  | 11.7 | M | 55% LVEF | - | n/d      | 55/73          | - | - | - | 0   | 0   | 11.0 | alive    | n/a |
| 46 | DMD  | 10.2 | M | NL LVEF  | - | /30(v)   | 71/35(79%/26%) | - | - | - | n/d | 1   | 1.4  | alive    | n/a |
| 48 | DMD  | 16.9 | M | 56% LVEF | - | n/d      | 64/51(67%/30%) | - | - | - | n/d | 0   | 6.6  | alive    | n/a |
| 48 | DMD  | 18.5 | M | 49% LVEF | - | n/d      | 61/41          | - | - | - | 1   | 0   | 0.0  | alive    | n/a |
| 48 | DMD  | 20.2 | M | n/d      | - | /27(v)   | 51/43          | - | - | - | 0   | 1   | 0.0  | alive    | n/a |
| 49 | DMD  | 10.4 | M | NL LVEF  | - | n/d      | 31/30(35%/36%) | - | - | - | 7   | 1   | 1.4  | alive    | n/a |
| 50 | DMD  | 10.5 | M | NL LVEF  | - | n/d      | n/d            | - | - | + | 20  | 0   | 5.0  | alive    | n/a |
| 50 | DMD  | 6.6  | M | NL LVEF  | - | n/d      | n/d            | - | - | - | n/d | 0   | 1.7  | alive    | n/a |
| 50 | DMD  | 9.2  | M | NL LVEF  | - | n/d      | n/d            | - | - | - | n/d | 0   | 5.3  | alive    | n/a |
| 51 | DMD  | 10.9 | M | NL LVEF  | - | 34/21    | n/d            | - | - | - | 11  | 1   | 8.4  | alive    | n/a |
| 53 | DMD  | 5.1  | M | NL LVEF  | - | n/d      | unable         | - | - | - | 12  | 0   | 0.6  | alive    | n/a |
| 59 | DMD  | 12.2 | M | NL LVEF  | - | /25(v)   | n/d            | - | - | - | 7   | 0   | 3.3  | alive    | n/a |
| 59 | DMD  | 15.5 | M | low LVEF | - | n/d      | 47/51(49%/30%) | - | - | - | n/d | 1   | 2.3  | alive    | n/a |
| 59 | DMD  | 18.1 | M | 41% LVEF | - | /29(v)   | 45/48          | - | - | - | n/d | 1   | 9.8  | alive    | n/a |
| 71 | DMD  | 18.1 | M | n/d      | - | 58/29    | unable         | - | - | - | n/d | 1   | 22.6 | deceased | 19  |
| 72 | DMD  | 13.1 | M | NL LVEF  | - | 40/27(v) | 35%/26%        | - | - | - | n/d | 0   | 17.2 | alive    | n/a |
| 72 | DMD  | 16.3 | M | n/d      | - | n/d      | n/d            | - | - | - | 1   | 1   | 12.6 | alive    | n/a |
| 4  | LGMD | 68.8 | M | NL LVEF  | + | /28(v)   | n/d            | - | - | + | 7   | -99 | 6.0  | alive    | n/a |
| 33 | LGMD | 26.7 | M | NL LVEF  | + | 59/24    | n/d            | - | - | - | 3   | 0   | 1.3  | alive    | n/a |
| 34 | LGMD | 10.7 | F | NL LVEF  | - | n/d      | 71/47          | - | - | - | 10  | 0   | 3.4  | alive    | n/a |
| 34 | LGMD | 13.3 | F | NL LVEF  | - | n/d      | 36/72          | - | - | - | 11  | 0   | 4.6  | alive    | n/a |
| 34 | LGMD | 15.0 | F | NL LVEF  | - | n/d      | 71/62          | - | - | - | 13  | 0   | 3.3  | alive    | n/a |
| 34 | LGMD | 16.0 | F | NL LVEF  | - | /26(v)   | n/d            | - | - | - | 14  | 0   | 3.3  | alive    | n/a |
| 40 | LGMD | 23.1 | M | NL LVEF  | - | /27(v)   | n/d            | - | - | - | 7   | 0   | 9.2  | alive    | n/a |
| 41 | LGMD | 12.8 | M | n/d      | - | /27(v)   | n/d            | - | - | - | n/d | 1   | 7.6  | alive    | n/a |
| 61 | LGMD | 44.7 | M | n/d      | - | n/d      | n/d            | - | - | - | 9   | 1   | 11.1 | alive    | n/a |
| 62 | LGMD | 54.4 | F | NL LVEF  | - | n/d      | n/d            | - | - | - | 3   | 0   | 2.4  | alive    | n/a |
| 63 | LGMD | 9.8  | F | NL LVEF  | - | /30(v)   | 42/40          | - | - | - | 2   | 0   | 1.0  | alive    | n/a |
| 65 | LGMD | 34.0 | M | 50% LVEF | - | /30(v)   | 43/37          | - | - | - | 11  | 0   | 2.5  | deceased | 47  |
| 67 | LGMD | 41.3 | M | NL LVEF  | - | n/d      | n/d            | - | - | + | n/d | 0   | 22.0 | deceased | 45  |



Only clinical reports within  $\pm$  6 months of the sleep study are included.

BMD: Becker muscular dystrophy; CMD: congenital muscular dystrophy; DM: myotonic dystrophy; DMD: Duchenne muscular dystrophy; LGMD: Limb-Girdle muscular dystrophy. +: yes; -: no; n/d: no data; n/a: not applicable; Echo: echocardiogram; NL LVEF: normal left ventricular ejection fraction; v: venous chemistry; M: male; F: female; echo: echocardiogram; ABG: arterial blood gases; PCO<sub>2</sub>: partial pressure of carbon dioxide; trach.: tracheostomy; ventil.: ventilation; Epwo.: Epworth; MIP: maximal inspiratory pressure; MEP: maximal expiratory pressure; AHI: apnea hypopnea index.

Echocardiogram is reported as normal (NL) LVEF or percentage of the normal value of LVEF.

ABG(PCO<sub>2</sub>/bicarb) is presented as either both PCO<sub>2</sub> and bicarbonate separated by '/' or bicarbonate after '/' from venous chemistry only.

MIP/MEP is presented as original values and percentages of the normal values, when available.

On ventilation refers to the time of the sleep study.

For the eight patients on beta blocker, all were on metoprolol except one patient (pID=60) who was on bisoprolol.

Vital status assessed as of January 2023.

**Table S2.** Muscular dystrophy patients with multiple PSG studies: 73 patients and 104 total studies.

| Number of studies | Number of Patients | Percentage of Patients |
|-------------------|--------------------|------------------------|
| 1                 | 57                 | 78.1                   |
| 2                 | 7                  | 9.6                    |
| 3                 | 7                  | 9.6                    |
| 4                 | 1                  | 1.4                    |
| 5                 | 0                  | 0.0                    |
| 6                 | 0                  | 0.0                    |
| 7                 | 0                  | 0.0                    |
| 8                 | 1                  | 1.4                    |

**Table S3.** Summary statistics of age, BMI, and heart rate for available studies.

| Type                             | N   | Min.  | 1 <sup>st</sup><br>Quantile | Median | Average | 3 <sup>rd</sup><br>Quantile | Max.  |
|----------------------------------|-----|-------|-----------------------------|--------|---------|-----------------------------|-------|
| Age (yrs)                        |     |       |                             |        |         |                             |       |
| BMD                              | 7   | 3.4   | 3.4                         | 18.0   | 30.1    | 54.4                        | 58.5  |
| CMD                              | 9   | 4.4   | 11.5                        | 14.2   | 13.6    | 14.3                        | 19.3  |
| DM                               | 37  | 0.3   | 7.3                         | 22.0   | 23.7    | 31.7                        | 69.2  |
| DMD                              | 38  | 2.8   | 10.5                        | 13.4   | 14.0    | 16.9                        | 25.4  |
| LGMD                             | 13  | 9.8   | 12.8                        | 23.1   | 28.5    | 34.0                        | 68.8  |
| All Types                        | 104 | 0.3   | 10.5                        | 14.4   | 20.3    | 25.4                        | 69.2  |
| BMI (kg/m <sup>2</sup> )         |     |       |                             |        |         |                             |       |
| BMD                              | 7   | 16.5  | 16.5                        | 29.0   | 26.9    | 31.3                        | 33.6  |
| CMD                              | 8   | 10.8  | 16.5                        | 17.7   | 17.4    | 19.5                        | 20.4  |
| DM                               | 37  | 13.3  | 16.1                        | 19.5   | 21.7    | 24.2                        | 38.4  |
| DMD                              | 38  | 13.8  | 16.9                        | 23.6   | 24.0    | 27.3                        | 45.2  |
| LGMD                             | 13  | 15.4  | 17.1                        | 22.3   | 24.1    | 26.4                        | 49.7  |
| All Types                        | 103 | 10.8  | 16.8                        | 21.1   | 22.9    | 27.8                        | 49.7  |
| Baseline Heart Rate (bpm)        |     |       |                             |        |         |                             |       |
| BMD                              | 7   | 55.0  | 55.0                        | 84.0   | 79.3    | 87.0                        | 110.0 |
| CMD                              | 7   | 78.0  | 78.0                        | 96.0   | 95.6    | 96.0                        | 114.0 |
| DM                               | 36  | 42.0  | 69.0                        | 79.5   | 84.9    | 95.0                        | 130.0 |
| DMD                              | 38  | 72.0  | 85.0                        | 96.0   | 97.6    | 110.0                       | 125.0 |
| LGMD                             | 13  | 60.0  | 66.0                        | 86.0   | 83.5    | 88.0                        | 114.0 |
| All Types                        | 101 | 42.0  | 75.0                        | 89.0   | 89.9    | 100.0                       | 130.0 |
| Sleep Average Heart Rate (bpm)   |     |       |                             |        |         |                             |       |
| BMD                              | 6   | 48.0  | 48.0                        | 62.8   | 67.2    | 71.9                        | 102.2 |
| CMD                              | 1   | 90.1  | 90.1                        | 90.1   | 90.1    | 90.1                        | 90.1  |
| DM                               | 22  | 50.0  | 65.3                        | 76.2   | 77.2    | 81.0                        | 110.0 |
| DMD                              | 28  | 62.0  | 86.9                        | 93.9   | 93.1    | 100.0                       | 117.7 |
| LGMD                             | 10  | 54.3  | 64.2                        | 82.3   | 78.8    | 86.6                        | 95.0  |
| All Types                        | 67  | 48.0  | 71.0                        | 85.3   | 83.4    | 94.4                        | 117.7 |
| Sleep Peak Heart Rate (bpm)      |     |       |                             |        |         |                             |       |
| BMD                              | 6   | 80.0  | 80.0                        | 111.5  | 112.7   | 116.0                       | 154.0 |
| CMD                              | 2   | 123.0 | 123.0                       | 125.5  | 125.5   | 128.0                       | 128.0 |
| DM                               | 22  | 79.0  | 90.0                        | 111.0  | 114.7   | 128.0                       | 197.0 |
| DMD                              | 33  | 89.0  | 120.0                       | 126.0  | 125.5   | 135.0                       | 140.0 |
| LGMD                             | 10  | 68.0  | 93.0                        | 116.0  | 112.0   | 121.0                       | 129.0 |
| All Types                        | 73  | 68.0  | 109.0                       | 121.0  | 119.3   | 129.0                       | 197.0 |
| Baseline CO <sub>2</sub> (mm Hg) |     |       |                             |        |         |                             |       |
| BMD                              | 7   | 22.0  | 22.0                        | 38.0   | 36.9    | 41.0                        | 43.0  |
| CMD                              | 7   | 36.0  | 36.0                        | 47.0   | 45.9    | 48.0                        | 58.0  |
| DM                               | 34  | 27.0  | 38.0                        | 40.5   | 42.1    | 46.0                        | 59.0  |
| DMD                              | 37  | 29.0  | 36.0                        | 40.0   | 39.9    | 43.0                        | 52.0  |

|                                       |     |      |      |       |       |       |       |
|---------------------------------------|-----|------|------|-------|-------|-------|-------|
| LGMD                                  | 12  | 34.0 | 37.0 | 40.0  | 40.2  | 41.0  | 48.0  |
| All Types                             | 97  | 22.0 | 37.0 | 40.0  | 40.9  | 45.0  | 59.0  |
| Sleep Average CO <sub>2</sub> (mm Hg) |     |      |      |       |       |       |       |
| BMD                                   | 5   | 35.1 | 35.1 | 40.7  | 40.1  | 40.7  | 47.0  |
| CMD                                   | 6   | 37.0 | 37.0 | 49.8  | 49.5  | 50.0  | 62.0  |
| DM                                    | 4   | 38.0 | 38.0 | 40.5  | 43.6  | 41.0  | 55.4  |
| DMD                                   | 29  | 26.4 | 41.7 | 44.0  | 44.0  | 47.6  | 55.2  |
| LGMD                                  | 10  | 38.6 | 38.9 | 44.8  | 44.4  | 46.0  | 49.0  |
| All Types                             | 54  | 26.4 | 41.0 | 44.1  | 44.3  | 47.7  | 62.0  |
| Sleep Peak CO <sub>2</sub> (mm Hg)    |     |      |      |       |       |       |       |
| BMD                                   | 5   | 40.1 | 40.1 | 46.0  | 47.8  | 46.0  | 55.0  |
| CMD                                   | 8   | 44.0 | 45.0 | 55.0  | 58.0  | 61.0  | 90.0  |
| DM                                    | 29  | 40.0 | 48.6 | 52.0  | 53.4  | 56.0  | 77.0  |
| DMD                                   | 38  | 35.2 | 46.0 | 50.2  | 50.2  | 54.0  | 65.0  |
| LGMD                                  | 9   | 47.0 | 47.0 | 49.0  | 49.6  | 51.0  | 53.2  |
| All Types                             | 89  | 35.2 | 47.0 | 51.0  | 51.7  | 54.9  | 90.0  |
| AHI (events/hr)                       |     |      |      |       |       |       |       |
| BMD                                   | 7   | 0.60 | 0.60 | 19.90 | 21.03 | 32.20 | 39.00 |
| CMD                                   | 9   | 0.00 | 0.30 | 4.20  | 5.08  | 6.70  | 12.60 |
| DM                                    | 37  | 0.00 | 0.80 | 6.30  | 6.87  | 9.00  | 39.40 |
| DMD                                   | 38  | 0.00 | 1.40 | 5.15  | 7.80  | 9.80  | 49.20 |
| LGMD                                  | 13  | 1.00 | 2.40 | 3.40  | 5.98  | 6.00  | 22.00 |
| All Types                             | 104 | 0.00 | 1.70 | 5.80  | 7.90  | 10.20 | 49.20 |

**Table S4.** Odds of sleep apnoea among muscular dystrophy types estimated by fitting logistic regression models adjusted for age, sex, and category of BMI z-score using GEE. **(A)** Adjusted odds of sleep apnoea by muscular dystrophy type for a male patient aged 15 years with BMI z-score between -2 and 2; and **(B)** Pairwise adjusted odds ratios (ORs) comparing risk of sleep apnoea between muscular dystrophy types. This analysis used 103 PSG studies and 73 patients (one subject with only one PSG was missing).

**A.** Estimated adjusted odds of sleep apnoea prevalence by muscular dystrophy type for a male patient aged 15 years with BMI z-score between -2 and 2. <sup>a</sup>

| Type | Estimated Odds | 95% Confidence Limits |      |
|------|----------------|-----------------------|------|
| BMD  | 0.68           | 0.17                  | 2.69 |
| CMD  | 0.76           | 0.21                  | 2.67 |
| DM   | 1.68           | 0.77                  | 3.85 |
| DMD  | 0.91           | 0.38                  | 2.21 |
| LGMD | 0.33           | 0.11                  | 0.98 |

<sup>a</sup> We chose 15 years as an integer-valued age between the mean and median of the entire sample. Though estimated odds of sleep apnoea would differ at other ages and for females or patients having extreme BMI z-scores, the regression model used implies that odds ratios between muscular dystrophy types adjusted to this

**B.** Pairwise adjusted odds ratios (ORs) comparing prevalence of sleep apnoea between muscular dystrophy types.

| Contrast   | OR   | Simultaneous 95% Confidence Limits <sup>a</sup> |       | p value <sup>a</sup> |
|------------|------|-------------------------------------------------|-------|----------------------|
| BMD - CMD  | 0.89 | 0.11                                            | 7.24  | 1.00                 |
| BMD - DM   | 0.40 | 0.05                                            | 3.31  | 0.76                 |
| BMD - DMD  | 0.74 | 0.12                                            | 4.66  | 0.99                 |
| BMD - LGMD | 2.07 | 0.25                                            | 16.98 | 0.88                 |
| CMD - DM   | 0.45 | 0.07                                            | 2.97  | 0.78                 |
| CMD - DMD  | 0.83 | 0.15                                            | 4.67  | 1.00                 |
| CMD - LGMD | 2.32 | 0.33                                            | 16.37 | 0.77                 |
| DM - DMD   | 1.84 | 0.33                                            | 10.35 | 0.87                 |
| DM - LGMD  | 5.15 | 1.47                                            | 18.03 | 0.003                |
| DMD - LGMD | 2.80 | 0.45                                            | 17.57 | 0.54                 |

particular set of covariate values match corresponding odds ratios estimated at other sets of values.

<sup>a</sup> The p values and confidence limits were adjusted via the Kramer-Tukey method to control the error rate simultaneously for all ten pairwise comparisons at  $\alpha = 0.05$ .

**Table S5.** AHI means and mean differences among muscular dystrophy types estimated by fitting regression models adjusted for age, sex, and category of BMI z-score using GEE. **(A)** Adjusted mean AHI by muscular dystrophy type for a male patient aged 15 years with BMI z-score between -2 and 2; and **(B)** Pairwise adjusted mean difference comparing risk of sleep apnoea between muscular dystrophy types. This analysis used 103 PSG studies and 72 patients (one subject with only one PSG was missing BMI).

| A. Estimated mean AHI (events/hr) by muscular dystrophy type for a male patient aged 15 years with BMI z-score between -2 and 2. <sup>a</sup> |                |                       |      |
|-----------------------------------------------------------------------------------------------------------------------------------------------|----------------|-----------------------|------|
| Type                                                                                                                                          | Estimated mean | 95% Confidence Limits |      |
| BMD                                                                                                                                           | 17.8           | 8.7                   | 27.0 |
| CMD                                                                                                                                           | 5.6            | 0.9                   | 10.4 |
| DM                                                                                                                                            | 5.8            | 2.2                   | 9.3  |
| DMD                                                                                                                                           | 7.5            | 3.7                   | 11.2 |
| LGMD                                                                                                                                          | 4.2            | 1.0                   | 7.3  |

<sup>a</sup> We chose 15 years as an integer-valued age between the mean and median of the entire sample. Though estimated mean AHI would differ at other ages and for females or patients having extreme BMI z-scores, the regression model used implies that mean differences between muscular dystrophy types adjusted to this particular set of covariate values match corresponding mean differences estimated at other sets of values.

| B. Pairwise adjusted mean difference in AHI (events/hr) between muscular dystrophy types. |                           |                |         |                      |                                                 |       |
|-------------------------------------------------------------------------------------------|---------------------------|----------------|---------|----------------------|-------------------------------------------------|-------|
| Contrast                                                                                  | Estimated Mean Difference | Standard Error | z value | p value <sup>a</sup> | Simultaneous 95% Confidence Limits <sup>a</sup> |       |
| BMD - CMD                                                                                 | 12.2                      | 5.1850         | 2.36    | 0.13                 | 26.36                                           | -1.93 |
| BMD - DM                                                                                  | 12.1                      | 4.8200         | 2.50    | 0.09                 | 25.21                                           | -1.08 |
| BMD - DMD                                                                                 | 10.4                      | 5.0484         | 2.05    | 0.24                 | 24.13                                           | -3.41 |
| BMD - LGMD                                                                                | 13.6                      | 4.7873         | 2.85    | 0.04                 | 26.71                                           | 0.59  |
| CMD - DM                                                                                  | -0.1                      | 1.9761         | -0.07   | 1.00                 | -5.54                                           | 5.24  |
| CMD - DMD                                                                                 | -1.9                      | 2.3880         | -0.78   | 0.94                 | -8.37                                           | 4.66  |
| CMD - LGMD                                                                                | 1.4                       | 2.4528         | 0.59    | 0.98                 | -5.26                                           | 8.13  |
| DM - DMD                                                                                  | -1.7                      | 2.1171         | -0.81   | 0.93                 | -7.48                                           | 4.07  |
| DM - LGMD                                                                                 | 1.6                       | 1.7363         | 0.91    | 0.89                 | -3.15                                           | 6.32  |
| DMD - LGMD                                                                                | 3.3                       | 2.4360         | 1.35    | 0.66                 | -3.35                                           | 9.94  |

<sup>a</sup> The p values and confidence limits were adjusted via the Kramer-Tukey method to control the error rate simultaneously for all ten pairwise comparisons at  $\alpha = 0.05$ .

**Table S6.** Odds of hypoventilation among muscular dystrophy types estimated by fitting logistic regression models adjusted for age, sex, and category of BMI z-score using GEE. **(A)** Adjusted odds of hypoventilation by muscular dystrophy type for a male patient aged 15 years with BMI z-score between -2 and 2; and **(B)** Pairwise adjusted odds ratios (ORs) comparing risk of hypoventilation between muscular dystrophy types. Because no BMD subjects exhibited hypoventilation, we combined types BMD and DMD, which each carry mutations in the same gene, into a single combined type “B\_DMD” for this analysis. This analysis used 102 PSG studies and 71 patients (one subject missing BMI had only one PSG; another subject missing hypoventilation status also had only one PSG).

| A. Estimated adjusted odds of hypoventilation prevalence by muscular dystrophy type for a male patient aged 15 years with BMI z-score between -2 and 2. <sup>a</sup> |                |                       |      |
|----------------------------------------------------------------------------------------------------------------------------------------------------------------------|----------------|-----------------------|------|
| Type                                                                                                                                                                 | Estimated Odds | 95% Confidence Limits |      |
| B_DMD                                                                                                                                                                | 0.40           | 0.14                  | 1.12 |
| CMD                                                                                                                                                                  | 0.83           | 0.22                  | 3.23 |
| DM                                                                                                                                                                   | 0.69           | 0.28                  | 1.72 |
| LGMD                                                                                                                                                                 | 0.13           | 0.02                  | 0.91 |

<sup>a</sup> We chose 15 years as an integer-valued age between the mean and median of the entire sample. Though estimated odds of hypoventilation would differ at other ages and for females or patients having extreme BMI z-scores, the regression model used implies that odds ratios between muscular dystrophy types adjusted to this particular set of covariate values match corresponding odds ratios estimated at other sets of values.

| B. Pairwise adjusted odds ratios (ORs) comparing prevalence of hypoventilation between muscular dystrophy types. |      |                                                 |        |                      |
|------------------------------------------------------------------------------------------------------------------|------|-------------------------------------------------|--------|----------------------|
| Contrast                                                                                                         | OR   | Simultaneous 95% Confidence Limits <sup>a</sup> |        | p value <sup>a</sup> |
| B_DMD - CMD                                                                                                      | 0.48 | 0.09                                            | 2.68   | 0.69                 |
| B_DMD - DM                                                                                                       | 0.58 | 0.12                                            | 2.80   | 0.81                 |
| B_DMD - LGMD                                                                                                     | 3.06 | 0.18                                            | 50.76  | 0.74                 |
| CMD - DM                                                                                                         | 1.20 | 0.18                                            | 7.97   | 0.99                 |
| CMD - LGMD                                                                                                       | 6.40 | 0.34                                            | 119.76 | 0.36                 |
| DM - LGMD                                                                                                        | 5.31 | 0.53                                            | 53.76  | 0.25                 |

<sup>a</sup> The p values and confidence limits were adjusted via the Kramer-Tukey method to control the error rate simultaneously for all six pairwise comparisons at  $\alpha = 0.05$ .

**Table S7.** Age-adjusted heart rate estimated by GEE for each type of muscular dystrophy. **(A)** Adjusted mean heart rate (bpm) at age 15 years with 95% confidence limits; and **(B)** Pairwise differences in adjusted mean heart rate between muscular dystrophy types.

| A. Estimated mean heart rate (bpm) at age 15 years <sup>a</sup> |       |                       |       |
|-----------------------------------------------------------------|-------|-----------------------|-------|
| Type                                                            | Mean  | 95% Confidence Limits |       |
| Baseline heart rate (101 studies, 72 patients)                  |       |                       |       |
| BMD                                                             | 83.1  | 65.0                  | 101.3 |
| CMD                                                             | 93.0  | 87.8                  | 98.3  |
| DM                                                              | 82.8  | 78.5                  | 87.1  |
| DMD                                                             | 95.3  | 90.2                  | 100.4 |
| LGMD                                                            | 87.6  | 82.4                  | 92.7  |
| In-sleep average heart rate (73 studies, 53 patients)           |       |                       |       |
| BMD                                                             | 69.7  | 48.5                  | 90.9  |
| CMD                                                             | 89.0  | 88.0                  | 90.1  |
| DM                                                              | 75.9  | 72.3                  | 79.4  |
| DMD                                                             | 91.4  | 87.1                  | 95.7  |
| LGMD                                                            | 81.3  | 75.4                  | 87.2  |
| In-sleep peak heart rate (73 studies, 53 patients)              |       |                       |       |
| BMD                                                             | 114.4 | 94.6                  | 134.1 |
| CMD                                                             | 123.9 | 123.4                 | 124.3 |
| DM                                                              | 112.4 | 106.9                 | 117.9 |
| DMD                                                             | 122.6 | 119.0                 | 126.3 |
| LGMD                                                            | 120.1 | 114.1                 | 126.1 |

<sup>a</sup> We chose 15 years as an integer-valued age between the mean and median of the entire sample. Though estimates at other ages would differ since heart rate tended to decrease with increasing age, differences between types are the same at all ages under the regression model used for estimation.



Table S7 continued

| B. Pairwise differences in adjusted mean heart rate between types |                           |                |         |                      |                                                 |       |
|-------------------------------------------------------------------|---------------------------|----------------|---------|----------------------|-------------------------------------------------|-------|
| Contrast                                                          | Estimated Mean Difference | Standard Error | z value | p value <sup>a</sup> | Simultaneous 95% Confidence Limits <sup>a</sup> |       |
| Baseline heart rate                                               |                           |                |         |                      |                                                 |       |
| BMD - CMD                                                         | -9.94                     | 9.7906         | -1.01   | 0.85                 | -36.64                                          | 16.77 |
| BMD - DM                                                          | 0.28                      | 9.3756         | 0.03    | 1.00                 | -25.29                                          | 25.86 |
| BMD - DMD                                                         | -12.18                    | 9.7509         | -1.25   | 0.72                 | -38.78                                          | 14.42 |
| BMD - LGMD                                                        | -4.47                     | 9.2128         | -0.48   | 0.99                 | -29.60                                          | 20.67 |
| CMD - DM                                                          | 10.22                     | 3.5241         | 2.90    | 0.03                 | 0.60                                            | 19.83 |
| CMD - DMD                                                         | -2.24                     | 3.6990         | -0.61   | 0.97                 | -12.33                                          | 7.85  |
| CMD - LGMD                                                        | 5.47                      | 3.8826         | 1.41    | 0.62                 | -5.12                                           | 16.06 |
| DM - DMD                                                          | -12.46                    | 3.4611         | -3.60   | 0.003                | -21.90                                          | -3.02 |
| DM - LGMD                                                         | -4.75                     | 3.2909         | -1.44   | 0.60                 | -13.72                                          | 4.23  |
| DMD - LGMD                                                        | 7.71                      | 3.8261         | 2.02    | 0.26                 | -2.72                                           | 18.15 |
| In-sleep average heart rate                                       |                           |                |         |                      |                                                 |       |
| BMD - CMD                                                         | -19.36                    | 10.8988        | -1.78   | 0.39                 | -49.09                                          | 10.37 |
| BMD - DM                                                          | -6.17                     | 10.9500        | -0.56   | 0.98                 | -36.04                                          | 23.70 |
| BMD - DMD                                                         | -21.71                    | 11.1750        | -1.94   | 0.30                 | -52.19                                          | 8.77  |
| BMD - LGMD                                                        | -11.60                    | 10.7134        | -1.08   | 0.82                 | -40.82                                          | 17.62 |
| CMD - DM                                                          | 13.19                     | 1.8518         | 7.12    | <0.0001              | 8.13                                            | 18.24 |
| CMD - DMD                                                         | -2.35                     | 2.2402         | -1.05   | 0.83                 | -8.46                                           | 3.76  |
| CMD - LGMD                                                        | 7.76                      | 3.0920         | 2.51    | 0.09                 | -0.68                                           | 16.19 |
| DM - DMD                                                          | -15.54                    | 2.8120         | -5.53   | <0.0001              | -23.21                                          | -7.87 |
| DM - LGMD                                                         | -5.43                     | 3.6049         | -1.51   | 0.56                 | -15.26                                          | 4.41  |
| DMD - LGMD                                                        | 10.11                     | 3.8492         | 2.63    | 0.07                 | -0.39                                           | 20.61 |
| In-sleep peak heart rate                                          |                           |                |         |                      |                                                 |       |
| BMD - CMD                                                         | -9.48                     | 10.1502        | -0.93   | 0.88                 | -37.16                                          | 18.21 |
| BMD - DM                                                          | 1.97                      | 10.4681        | 0.19    | 1.00                 | -26.59                                          | 30.52 |
| BMD - DMD                                                         | -8.26                     | 10.3622        | -0.80   | 0.93                 | -36.53                                          | 20.01 |
| BMD - LGMD                                                        | -5.72                     | 10.2058        | -0.56   | 0.98                 | -33.56                                          | 22.11 |
| CMD - DM                                                          | 11.44                     | 2.8482         | 4.02    | 0.0006               | 3.67                                            | 19.21 |
| CMD - DMD                                                         | 1.21                      | 1.8377         | 0.66    | 0.96                 | -3.80                                           | 6.23  |
| CMD - LGMD                                                        | 3.75                      | 3.1176         | 1.20    | 0.75                 | -4.75                                           | 12.26 |

|            |        |        |       |      |        |       |
|------------|--------|--------|-------|------|--------|-------|
| DM - DMD   | -10.23 | 3.4160 | -2.99 | 0.02 | -19.55 | -0.91 |
| DM - LGMD  | -7.69  | 4.0058 | -1.92 | 0.31 | -18.62 | 3.24  |
| DMD - LGMD | 2.54   | 3.6505 | 0.69  | 0.96 | -7.42  | 12.49 |

<sup>a</sup> The p values and confidence limits were adjusted via the Kramer-Tukey method to control the error rate simultaneously for all ten pairwise comparisons for a given response at  $\alpha = 0.05$ .
